# Supplementary material for: Association Between Antibiotics Use and Diabetes Incidence: A Nationally Representative Cohort Among Koreans
Source: Research Square preprint supplement (doi:10.21203/rs.3.rs-774773/v1), 2021-08-05
Supplement: Supplementary file 1 [file 541e405d59b92ab51dc4f13c.docx]

**Supplementary Table 1.** Examples of antibiotics for each class based on the World Health Organization Anatomical Therapeutic Chemical (WHO ATC) guidelines.

| **Antibiotics class** | **Types of antibiotics for each class** |
| --- | --- |
| Macrolides | erythromycin, spiramycin, midecamycin, oleandomycin, roxithromycin, josamycin, troleandomycin, clarithromycin, azithromycin, miocamycin, rokitamycin, dirithromycin, flurithromycin, telithromycin, solithromycin |
| Penicillins | ampicillin, pivamicillin, carbenicillin, amoxicillin, amoxicillin and clavulanate, azlocillin, mezlocillin, mecillinam, piperacillin, ticarcillin, metampicillin, talampicillin, dicloxacillin, oxacillin |
| Cephalosporins | cefalexin, cefaloridine, cefalotin, cefazolin, cefatrizine, ceftezole, cefoxitin, cefotetan, cefonicid, cefotaxime, ceftazidime, ceftriaxone, cefmenoxime, cefdinir, cefteram, cefepime, cefpirome, cefaclor, cefuroxime |
| Fluoroquinolones | ofloxacin, ciprofloxacin, pefloxacin, enoxacin, temafloxacin, norfloxacin, levofloxacin, moxifloxacin, gemifloxacin, gatifloxacin, sitafloxacin |
| Sulfonamides | sulfaisodimidine, sulfamethizole, sulfadimidine, sulfapyridine, sulfafurazole, sulfanilamide, sulfathiazole, sulfathiourea, sulfamethoxazole and trimethoprim, sulfadiazine, sulfasalazine, sulfamoxole |
| Lincosamides | Clindamycin, lincomycin |
| Tetracyclines | Doxycycline, tetracycline |

**Supplementary Table 2.** Representative sources of infection according to the ICD-10 codes, mainly categorized by systems.

| **Infectious diseases** | **ICD-10 codes** |
| --- | --- |
| **Respiratory diseases** |  |
| Pneumonia & Influenza | J09, J10, J11, J12, J13, J14, J15, J16, J17, J18 |
| Chronic bronchitis | J41, J42 |
| **Urinary tract infections (UTI)** |  |
| Cystitis | N30 |
| Acute pyelonephritis | N10 |
| Urethritis | N34, N37 |
| **Skin, soft tissue, bone and joint infections (SSTBJ)** |  |
| Cellulitis | L03 |
| Erysipelas | A46 |
| Impetigo | L01 |
| Folliculitis | L66.2, L66.4 |
| Furuncle & Carbuncle | L02 |
| Osteomyelitis | M86 |
| Synovitis | M65, M67, M68, M70 |
| **Intra-abdominal infections (IAI)** |  |
| Cholecystitis & Cholangitis | K80, K81, K83 |
| Appendicitis | K35, K36, K37 |
| Diverticulitis | K57 |
| Peritonitis | K65 |
| Pancreatitis | K85 |
| **Others** |  |
| Acute/chronic otitis media | H65, H66 |
| Sepsis | A40, A41 |
| Central nervous system infection | A81, A89 |

**Supplementary Table 3.** Baseline characteristics for the indications for the use of antibiotics, classified by source of infection.

|  | **Total population** | **Antibiotics non-user** | **Antibiotics User** | | |
| --- | --- | --- | --- | --- | --- |
| **Number of cumulative days prescribed** | | |
| **1-29** | **30-89** | **≥ 90** |
| **Number of people** | 201,459 | 24,178 | 107,618 | 55,958 | 13,705 |
|  |  |  |  |  |  |
| **Infectious Diseases** |  |  |  |  |  |
| **Respiratory diseases, N (%)** |  |  |  |  |  |
| No | 187,536 (93.09) | 24,178 (100) | 102,938 (95.65) | 49,535 (88.52) | 10,885 (79.42) |
| Yes | 13,923 (6.91) |  | 4,680 (4.35) | 6,423 (11.48) | 2,820 (20.58) |
| **Urinary tract infections (UTI), N (%)** |  |  |  |  |  |
| No | 181,579 (90.13) | 24,178 (100) | 100,869 (93.73) | 46,231 (82.62) | 10,301 (75.16) |
| Yes | 19,880 (9.87) |  | 6,749 (6.27) | 9,727 (17.38) | 3,404 (24.84) |
| **Skin, soft tissue, bone and joint infections (SSTBJ), N (%)** |  |  |  |  |  |
| No | 183,367 (91.02) | 24,178 (100) | 100,025 (92.94) | 47,970 (85.73) | 11,194 (81.68) |
| Yes | 18,092 (8.98) |  | 7,593 (7.06) | 7,988 (14.27) | 2,511 (18.32) |
| **Intra-abdominal infections (IAI), N (%)** |  |  |  |  |  |
| No | 199,662 (99.11) | 24,178 (100) | 106,856 (99.29) | 55,152 (98.56) | 13,476 (98.33) |
| Yes | 1,797 (0.89) |  | 762 (0.71) | 806 (1.44) | 229 (1.67) |
| **Others, N (%)** |  |  |  |  |  |
| No | 190,344 (94.48) | 24,178 (100) | 104,061 (96.69) | 50,755 (90.70) | 11,350 (82.82) |
| Yes | 11,115 (5.52) |  | 3,557 (3.31) | 5,203 (9.30) | 2,355 (17.18) |

Others include acute/chronic otitis media, sepsis and central nervous system infection.

**Supplementary Table 4.** Hazard ratios for diabetes by number of cumulative days antibiotics prescribed in antibiotics users.

|  | **Number of cumulative days antibiotics prescribed** | | |  |
| --- | --- | --- | --- | --- |
|  | **1-29** | **30-89** | **≥ 90** | ***p* for trend** |
| Events, N | 7,047 | 3,989 | 1,144 |  |
| Person-years, 104 | 103 | 53 | 13 |  |
|  |  |  |  |  |
| aHR (95% CI) |  |  |  |  |
| Model 1 | **1.00 (ref.)** | 1.07 (1.03 1.11) | 1.21 (1.13 1.28) | <0.001 |
| Model 2 | **1.00 (ref.)** | 1.08 (1.04 1.13) | 1.23 (1.15 1.31) | <0.001 |
| Model 3 | **1.00 (ref.)** | 1.06 (1.02 1.11) | 1.19 (1.11 1.27) | <0.001 |

Acronyms; aHR, adjusted hazard ratio; CI, confidence interval; ref., reference.

Model 1 Adjusted for age, sex, and body mass index.

Model 2 Adjusted for Model 1 plus smoking status, days with alcohol drinking per week, physical activity, household income, and residence.

Model 3 Adjusted for Model 2 plus family history of diabetes, Charlson comorbidity index, fasting blood sugar, total cholesterol, acid suppressants use, and infectious diseases (respiratory diseases, urinary tract infections, skin, soft tissue, bone and joint infections, intra-abdominal infections, and others).

**Supplementary Table 5**. Adjusted hazard of diabetes incidence according to the number of antibiotic classes.

|  |  | **Antibiotics class number** | | | | |  |
| --- | --- | --- | --- | --- | --- | --- | --- |
| **Antibiotics non-user** | **1** | **2** | **3** | **4** | **5 or more** | ***p* for trend** |
| N of people (%) | 24,178 (12.00) | 34,686 (17.22) | 44,631 (22.15) | 44,708 (22.19) | 33,275 (16.52) | 19,981 (9.92) |  |
| Events, N | 1,586 | 2,247 | 2,930 | 3,098 | 2,401 | 1,504 |  |
| Person-years, 104 | 23 | 33 | 43 | 43 | 32 | 19 |  |
|  |  |  |  |  |  |  |  |
| aHR (95% CI) | **1.00 (ref.)** | 0.97 (0.91 1.04) | 0.97 (0.92 1.04) | 1.02 (0.96 1.09) | 1.05 (0.98 1.12) | **1.11 (1.03 1.19)** | <0.001 |

Acronyms; N, number; aHR, adjusted hazard ratio; CI, confidence interval; ref., reference.

Model Adjusted for age, sex, body mass index, smoking status, days with alcohol drinking per week, physical activity, household income, residence, family history of diabetes, Charlson comorbidity index, fasting blood sugar, total cholesterol, and acid suppressants use. The estimates were based on fully adjusted models.

Antibiotics were divided into seven classes consisting of penicillin, cephalosporin, macrolide, fluoroquinolone, sulfonamides, tetracyclines, and lincosamides or others.
